# Supplementary material for: Development of Two-Layer Hybrid Scaffolds Based on Oxidized Polyvinyl Alcohol and Bioactivated Chitosan Sponges for Tissue Engineering Purposes
Source: MDPI journal article supplement (doi:10.3390/ijms232012059), 2022-10-11
Supplement: s1 [file s1]

## Supplementary Material

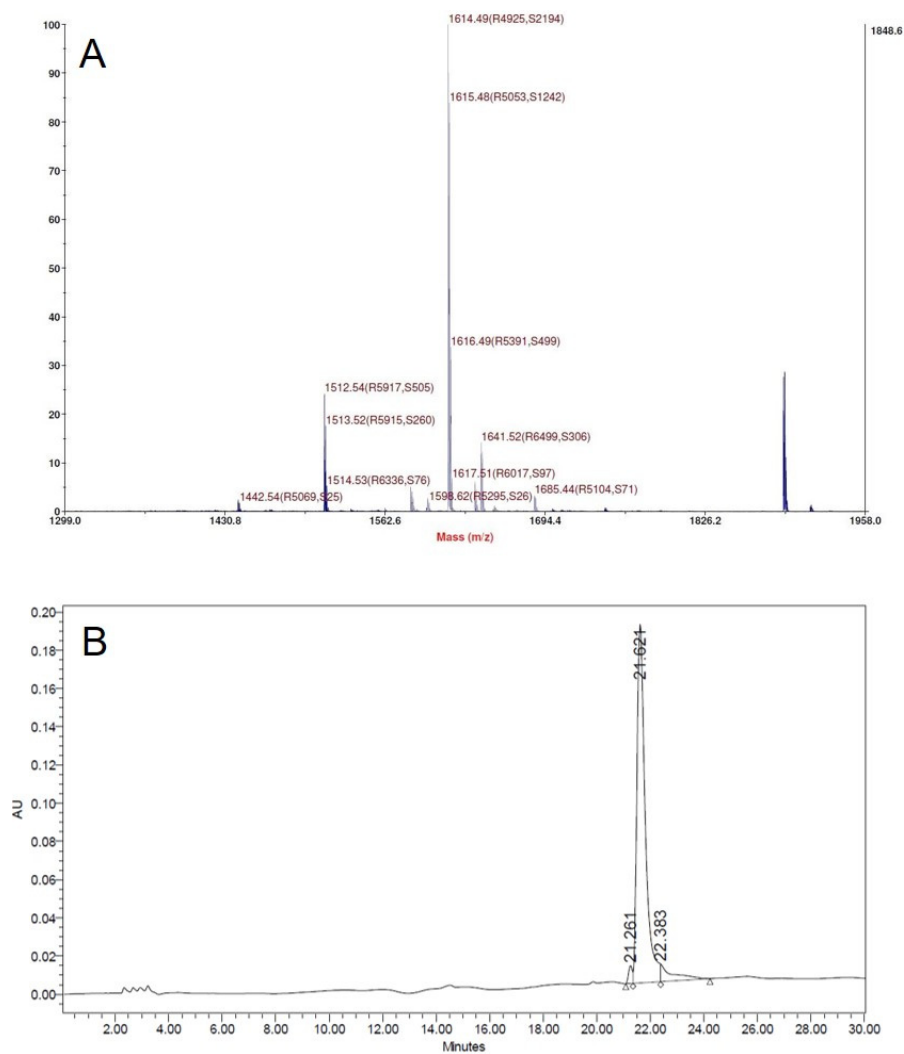

**Figure S1.** (A) MALDI-TOF spectrum of crude peptide EAK: experimental mass = 1614.520 Da; theoretical mass = 1614.79 Da. (B) Analytical chromatogram of purified EAK (conditions: Vydac C<sub>18</sub> column (5  $\mu$ m, 300  $\text{\AA}$ , 4.6  $\times$  250 mm, Grace), eluent A: 0.05% TFA in H<sub>2</sub>O; eluent B: 0.05% TFA in CH<sub>3</sub>CN; gradient: from 5 to 20 % di B in 30 min, flow rate: 1 mL/min; detector: 214 nm).

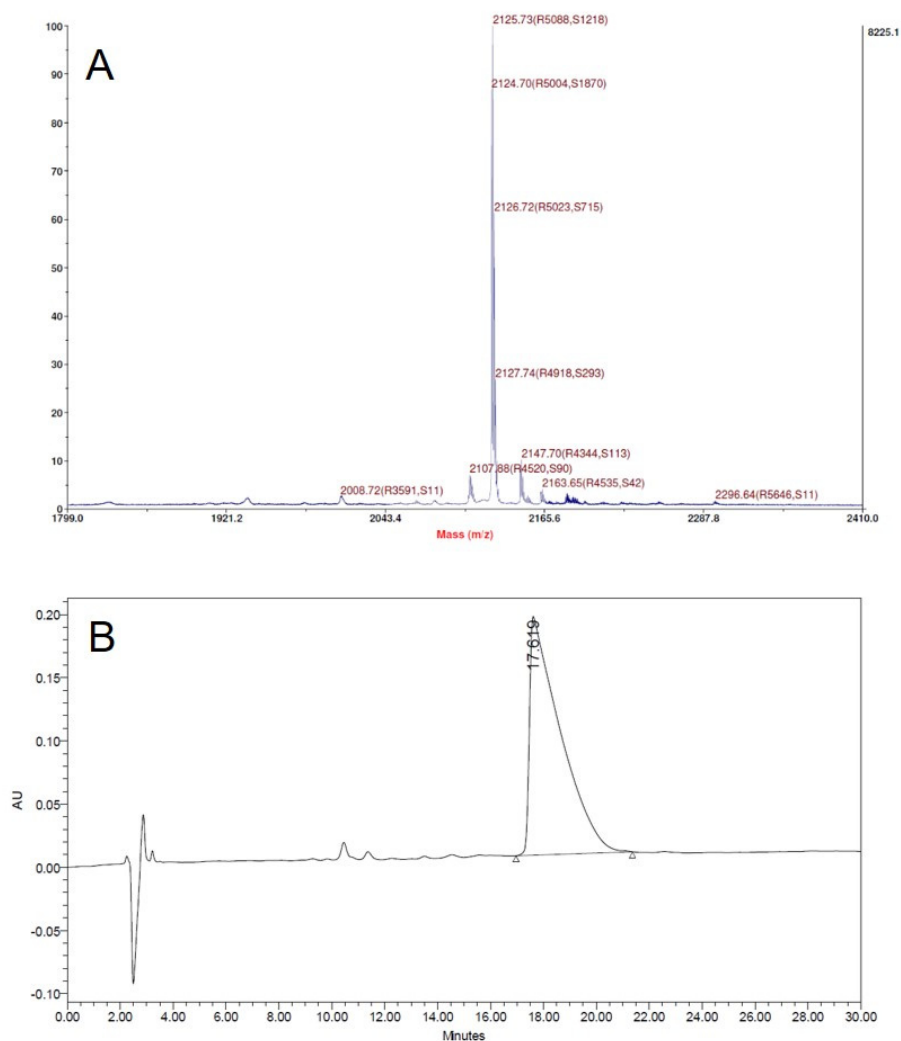

**Figure S2.** (A) MALDI-TOF spectrum of crude peptide EAK-IKVAV: experimental mass = 2125.73 Da; theoretical mass = 2125.48 Da. (B) Analytical chromatogram of purified EAK-IKVAV (conditions: Nova-Pak HR C<sub>18</sub> column (4  $\mu$ m, 60 Å, 3.9  $\times$  300 mm, Waters), eluent A: 0.05% TFA in H<sub>2</sub>O; eluent B: 0.05% TFA in CH<sub>3</sub>CN; gradient: from 15 to 30% di B in 30 min, flow rate: 1 mL/min; detector: 214 nm).

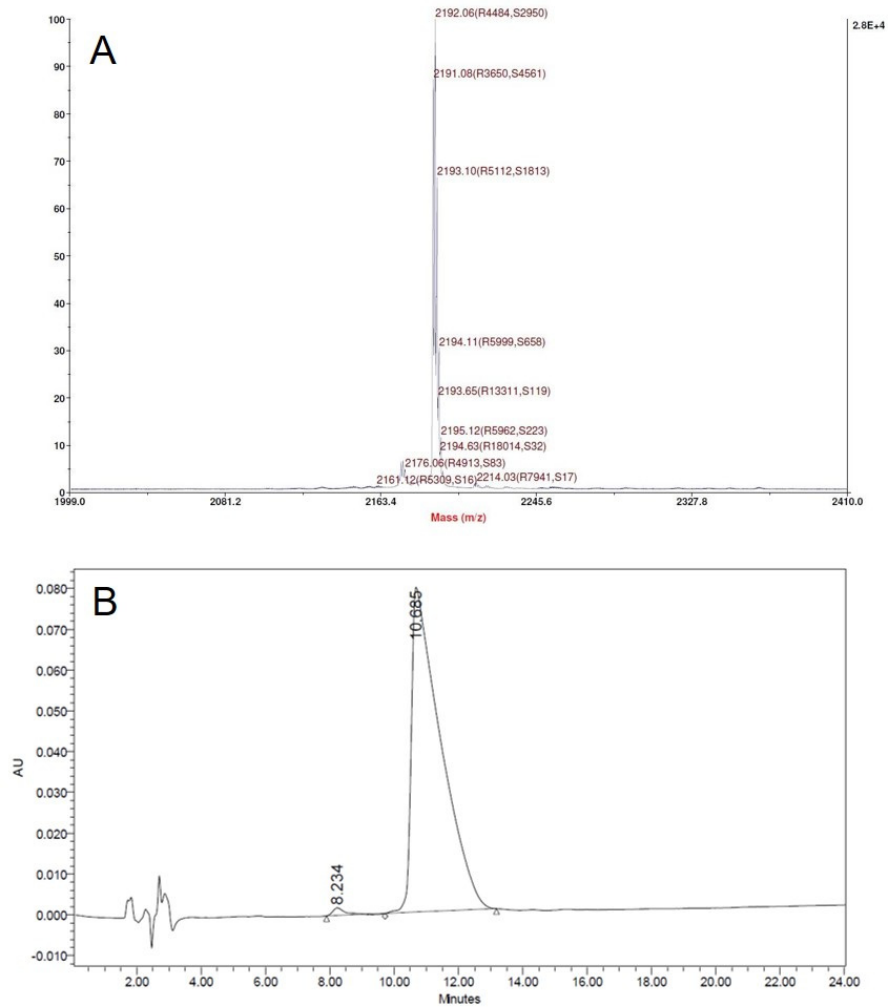

**Figure S3.** (A) MALDI-TOF spectrum of crude peptide EAK-YIGSR: experimental mass = 2192.06 Da; theoretical mass = 2191.45 Da. (B) Analytical chromatogram of purified EAK-YIGSR (conditions: Nova-Pak HR C<sub>18</sub> column (4  $\mu$ m, 60  $\text{\AA}$ , 3.9  $\times$  300 mm, Waters), eluent A: 0.05% TFA in H<sub>2</sub>O; eluent B: 0.05% TFA in CH<sub>3</sub>CN; gradient: from 18 to 26 % di B in 24 min, flow rate: 1 mL/min; detector: 214 nm).
